# Supplementary material
Source: PubMed Central journal article supplement (PMC6287923)
Supplement: NIHMS1512279-supplement-1.pdf [file NIHMS1512279-supplement-1.pdf]

## Appendix

**Supplementary Table 1.** Cardiovascular adverse events grouping as a function of Medical Dictionary for Regulatory Activities (MedDRA) Classification Version 20.1.

| Groups                                                 | MedDRA Terms used                                                                              |
|--------------------------------------------------------|------------------------------------------------------------------------------------------------|
| Hypertension and related end-organ damages             | Hypertension (SMQ narrow 20.1)                                                                 |
| Arterial systemic ischemia                             | Embolic and thrombotic events, arterial (SMQ narrow 20.1)                                      |
| Myocardial infarction                                  | Myocardial infarction (SMQ narrow 20.1)                                                        |
| Cerebral arterial ischemia                             | Ischaemic central nervous system vascular conditions (SMQ narrow 20.1)                         |
| Cardiac valve disorders                                | Cardiac valve disorders (HLGT narrow 20.1)                                                     |
| Endocardial disorders                                  | Endocardial disorders (HLGT 20.1)                                                              |
| Cardiac supra-ventricular arrhythmias                  | Supraventricular tachyarrhythmias (SMQ narrow 20.1)                                            |
| Cardiac ventricular arrhythmias                        | Ventricular tachyarrhythmias (SMQ narrow 20.1)                                                 |
| Torsade de pointes / QT prolongation                   | Torsade de pointes/ QT prolongation (SMQ narrow 20.1)                                          |
| Cardiac conductive disorders                           | Cardiac conduction disorders (HLT 20.1)                                                        |
| Heart Failure                                          | Cardiac Failure (SMQ narrow 20.1)                                                              |
| Cardiac death or shock                                 | Shock-associated circulatory or cardiac conditions (excl torsade de pointes) (SMQ narrow 20.1) |
| Myocarditis                                            | Non-infectious myocarditis (HLT 20.1)                                                          |
| Pericardial diseases                                   | Non-infectious pericarditis (HLT 20.1) and Pericardial disorders NEC (HLT 20.1)                |
| Vascular neoplasm                                      | Vascular neoplasm (HLT 20.1)                                                                   |
| Hemorrhage (clinical events)                           | Haemorrhage terms (excl laboratory terms) (SMQ narrow 20.1)                                    |
| Biological hemostatic disorders favoring hemorrhage    | Haemorrhage laboratory terms (SMQ narrow 20.1)                                                 |
| Cerebral hemorrhage                                    | Haemorrhagic central nervous system vascular conditions (SMQ narrow 20.1)                      |
| Pulmonary hypertension and related cardiac involvement | Pulmonary hypertension (SMQ narrow 20.1)                                                       |
| Vasculitis                                             | Vasculitis (SMQ narrow 20.1)                                                                   |
| Temporal arteritis / Polymyalgia rheumatica            | Polymyalgia rheumatica (PT 20.1) and Temporal arteritis (PT 20.1)                              |
| Dyslipidemia                                           | Dyslipidaemia (SMQ 20.1 narrow)                                                                |

*Abbreviations:* HL(G)T: High Level (Group) Term; NEC: Not elsewhere classified; PT: Preferred Term; SMQ: Standardized MedDRA Query.

**Supplementary Table 2. Example of calculation of the reporting Odds-Ratios (ROR) from VigiBase.**

|                                                                                    | <b>Reports with the suspected AE:</b> | <b>Reports without the suspected AE</b> |
|------------------------------------------------------------------------------------|---------------------------------------|-----------------------------------------|
| <b>Reports with suspected group of drugs</b> (example: mono-immunotherapy)         | A                                     | B                                       |
| <b>Reports with comparator group of drugs</b> (example: combination immunotherapy) | C                                     | D                                       |

A: Number of reports of drug-induced AE of interest (e.g; myocarditis) associated with the given group of drug (mono-immunotherapy).

B: Number of reports of other AE (e.g; all AE excluding myocarditis) associated with the given group of drug (mono-immunotherapy).

C: Number of reports of AE of interest (e.g; myocarditis) associated with a comparator group of drugs (combination immunotherapy).

D: Number of reports of other AE (e.g; all AE excluding myocarditis) associated with a comparator group of drugs (combination immunotherapy).

$$\text{ROR} = (A/C)/(B/D) = AD/BC. \quad (1)$$

Abbreviations: AE, adverse event; CV-irAE: immune related cardiovascular adverse events; ROR: Reporting Odds-Ratio

**Supplementary Table 3.** Details concerning patients with immune checkpoint inhibitors (ICI) associated cardiac supra-ventricular arrhythmias collected from VigiBase (last accessed: 01/2018)

| Characteristics                                                                                                                                                                                                                                                                                    | N (%)                                                                                                                           | Data availability, n (%) |
|----------------------------------------------------------------------------------------------------------------------------------------------------------------------------------------------------------------------------------------------------------------------------------------------------|---------------------------------------------------------------------------------------------------------------------------------|--------------------------|
| <b>Region reporting, n (%)</b><br>Americas:<br>Europe<br>Australia<br>Asia<br>Africa                                                                                                                                                                                                               | 156 (70.3)<br>59 (26.6)<br>5 (2.3)<br>1 (0.4)<br>1 (0.4)                                                                        | 222(100.0)               |
| <b>Reporting Year</b><br>2018 ( <i>thru January 2018</i> )<br>2017<br>2016<br>2015<br>2014<br>2013<br>2012<br>2009-2011                                                                                                                                                                            | 11 (5.0)<br>85 (38.3)<br>45 (20.3)<br>43 (19.4)<br>19 (8.5)<br>6 (2.7)<br>8 (3.6)<br>5 (2.2)                                    | 222 (100.0)              |
| <b>Gender</b><br>Male<br>Female                                                                                                                                                                                                                                                                    | 157 (72.0)<br>61 (28.0)                                                                                                         | 218 (98.2)               |
| <b>Age at onset, mean ± SD (years)</b><br>[min-max]                                                                                                                                                                                                                                                | 68.1 ± 10.3<br>[23-90]                                                                                                          | 199 (89.6)               |
| <b>Suspected Drugs *</b><br>Only ICI<br>ICI + 1 other drug<br>ICI + ≥2 other drugs                                                                                                                                                                                                                 | 168 (75.7)<br>38 (17.1)<br>16 (7.2)                                                                                             | 222(100.0)               |
| <b>Drugs</b><br><u>Monotherapy with Anti PD-1/PD-L1</u><br>- Nivolumab<br>- Pembrolizumab<br>- Atezolizumab<br>- Avelumab<br>- Durvalumab<br><br><u>Monotherapy with Anti CTLA-4</u><br>- Ipilimumab<br><br><u>Combination therapy</u><br>- Nivolumab + Ipilimumab<br>- Pembrolizumab + Ipilimumab | 122 (55.0)<br>72 (32.4)<br>37 (16.7)<br>4 (1.8)<br>6 (2.7)<br>3 (1.4)<br><br>65 (29.3)<br><br>35 (15.7)<br>34 (15.3)<br>1 (0.4) | 222(100.0)               |
| <b>Number of ICI administration before onset, median [IQR]</b><br>[min-max]                                                                                                                                                                                                                        | 2 [1-4.3]<br>[1-69]                                                                                                             | 82 (37.0)                |
| <b>Time to irAE onset, days:</b><br>Median delay between treatment and irAE, median [IQR]<br>[min-max]                                                                                                                                                                                             | 14 [1-52]<br>[1- 925]                                                                                                           | 102 (46.0)               |
| <b>Severe AE</b>                                                                                                                                                                                                                                                                                   | 189 (87.5)                                                                                                                      | 216 (97.3)               |
| <b>Death</b>                                                                                                                                                                                                                                                                                       | 53 (23.9)                                                                                                                       | 222 (100.0)              |
| <b>Malignant neoplasm progression</b>                                                                                                                                                                                                                                                              | 22 (9.9)                                                                                                                        | 222 (100.0)              |
| <b>Indications</b><br>Malignant melanoma<br>Lung cancer<br>Renal carcinoma<br>Prostate cancer                                                                                                                                                                                                      | 101 (50.5)<br>55 (27.5)<br>9 (4.5)<br>5 (2.5)                                                                                   | 200 (90.0)               |

|                                                                                     |            |             |
|-------------------------------------------------------------------------------------|------------|-------------|
| Urothelial carcinoma                                                                | 4 (2.0)    |             |
| Lymphoma (all variants)                                                             | 4 (2.0)    |             |
| Neoplasm malignant (tissue not specified)                                           | 3 (1.5)    |             |
| Squamous cell carcinoma of head and neck                                            | 3 (1.5)    |             |
| Head and neck carcinoma                                                             | 3 (1.5)    |             |
| Plasma cell myeloma                                                                 | 2 (1.0)    |             |
| Merkel cell carcinoma                                                               | 2 (1.0)    |             |
| Chronic lymphocytic leukemia                                                        | 2 (1.0)    |             |
| Breast cancer                                                                       | 2 (1.0)    |             |
| Colon cancer                                                                        | 1 (0.5)    |             |
| Salivary gland cancer                                                               | 1 (0.5)    |             |
| Ovarian epithelial cancer                                                           | 1 (0.5)    |             |
| Glioblastoma                                                                        | 1 (0.5)    |             |
| Esophageal carcinoma                                                                | 1 (0.5)    |             |
| <b>Reported cardiac supra-ventricular arrhythmias</b>                               |            | 222 (100.0) |
| Atrial fibrillation                                                                 | 172 (77.5) |             |
| Supraventricular tachycardia and extra-systoles                                     | 23 (10.4)  |             |
| Atrial flutter                                                                      | 16 (7.2)   |             |
| Sinus Tachycardia                                                                   | 11 (4.9)   |             |
| <b>Concurrent irAE favoring cardiac supra-ventricular arrhythmias</b>               |            | 222 (100.0) |
| <u>None (lone)</u>                                                                  | 38 (17.1)  |             |
| <u>Gastro-intestinal disorders (any)</u>                                            | 93 (41.9)  |             |
| Diarrhea / Colitis / Gastroenteritis/ Enteritis/ Dehydration                        | 58 (26.1)  |             |
| Hepatitis / Hepatic failure / Gallbladder disorders                                 | 19 (8.6)   |             |
| Gastrointestinal bleeding                                                           | 14 (6.3)   |             |
| Nausea / Vomiting                                                                   | 13 (5.9)   |             |
| Abdominal pain                                                                      | 10 (4.5)   |             |
| Gastrointestinal obstruction                                                        | 7 (3.2)    |             |
| Pancreatitis                                                                        | 2 (0.9)    |             |
| Other gastrointestinal conditions / unspecified gastrointestinal disorders          | 22 (9.9)   |             |
| <u>Endocrino-metabolic disorders</u>                                                | 66 (29.7)  |             |
| Thyroid disorders                                                                   | 29 (13.1)  |             |
| Fever                                                                               | 18 (8.1)   |             |
| Potassium imbalance                                                                 | 8 (3.6)    |             |
| Adrenal insufficiency                                                               | 7 (3.2)    |             |
| Diabetes/ blood glucose increased / hyperglycemia / Diabetic Ketoacidosis           | 4 (1.8)    |             |
| Hypophysitis                                                                        | 2 (0.9)    |             |
| Other endocrine-metabolic conditions / unspecified endocrine-metabolic disorders    | 12 (5.4)   |             |
| <u>Pulmonary condition</u>                                                          | 47 (21.2)  |             |
| Pneumonia/ Pneumonitis                                                              | 29 (13.1)  |             |
| Pleural effusion                                                                    | 9 (4.1)    |             |
| Respiratory failure                                                                 | 8 (3.6)    |             |
| Bronchitis                                                                          | 1 (0.4)    |             |
| Interstitial lung disease                                                           | 1 (0.4)    |             |
| Other pulmonary conditions / unspecified pulmonary disorders                        | 9 (4.1)    |             |
| <u>Cardiac condition</u>                                                            | 69 (31.1)  |             |
| Cardiac failure/ decreased EF/ Pulmonary edema/ Pulmonary Hypertension              | 27 (12.2)  |             |
| Pulmonary thromboembolism                                                           | 11 (5.0)   |             |
| Myocardial infarction/ Coronary artery disease/Cardiac ischemia                     | 8 (3.6)    |             |
| Cardiac arrhythmias (Long QT, ventricular arrhythmias, Torsade de pointes, syncope) | 7 (3.2)    |             |
| Pericardial effusion/ Tamponade/ Pericarditis                                       | 6 (2.7)    |             |
| Cardiomyopathy                                                                      | 5 (2.3)    |             |
| Cardiogenic shock/ Cardiac arrest                                                   | 5 (2.3)    |             |
| Myocarditis                                                                         | 4 (1.8)    |             |
| Other cardiovascular conditions / unspecified cardiovascular disorders              | 14 (6.3)   |             |
| <u>Renal condition</u>                                                              | 23 (10.4)  |             |
| Renal failure /Acute kidney injury                                                  | 19 (8.6)   |             |

|                                                                                                         |           |  |
|---------------------------------------------------------------------------------------------------------|-----------|--|
| Nephrotic syndrome                                                                                      | 1 (0.4)   |  |
| Other renal conditions / unspecified renal conditions                                                   | 3 (1.4)   |  |
| <u>Neurologic condition</u>                                                                             | 28 (12.6) |  |
| Decreased level of consciousness                                                                        | 11 (5.0)  |  |
| Stoke (ischemic or hemorrhagic)                                                                         | 4 (1.8)   |  |
| Encephalitis /meningitis                                                                                | 3 (1.4)   |  |
| Ophthalmological abnormality (vision)                                                                   | 1 (0.5)   |  |
| Peripheral neuropathy (Guillain-Barre)                                                                  | 2 (0.9)   |  |
| Other neurologic conditions / unspecified neurologic conditions                                         | 11 (5.0)  |  |
| <u>Dermatologic and Rheumatologic condition</u>                                                         | 37 (16.7) |  |
| myositis / myasthenia gravis / muscular involvement                                                     | 15 (6.8)  |  |
| Rash / Alopecia                                                                                         | 9 (4.1)   |  |
| Erysipelas/ fasciitis /Dermatitis bullous                                                               | 3 (1.4)   |  |
| Pruritis                                                                                                | 1 (0.4)   |  |
| Other dermatologic and rheumatologic conditions / unspecified dermatologic and rheumatologic conditions | 11 (5.0)  |  |
| <u>Hematologic condition</u>                                                                            | 27 (12.2) |  |
| Anemia                                                                                                  | 18 (8.1)  |  |
| Cytopenia (pancytopenia, leukocytopenia, thrombocytopenia)                                              | 9 (4.1)   |  |
| Other hematologic conditions/ Unspecified hematologic conditions                                        | 4 (1.8)   |  |

\* Other concomitant reported suspected medications were alkylating agents and antimetabolites (n: 28), tyrosine kinase inhibitors (n: 24), other immunotherapies e.g. interleukin-2 (n: 22), and anticoagulants (n: 6).

Abbreviations: CTLA-4, cytotoxic T-lymphocyte-associated protein 4; ICI, immune checkpoint inhibitor; IQR, interquartile range; irAE, immune related adverse event; [min-max], minimum-maximum; PD-1, programmed cell death protein 1; PD-L1, programmed cell death ligand 1; SD, standard deviation
